# Supplementary material
Source: MDPI journal article supplement (https://www.mdpi.com/1996-1073/16/15/5688)
Supplement: s1 [file s1]

Archive with 6 entries (6 files):
- Figure S1, supplement.pdf
- Figure S2, supplement.pdf
- Figure S3, supplement.pdf
- Figure S4, supplement.pdf
- SM Methods.pdf
- Table S1.pdf
