# Supplementary material
Source: MDPI journal article supplement (https://www.mdpi.com/1996-1073/16/15/5688)
Supplement: s1 [file s1 › Table S1.pdf]

**Table S1.** Elemental composition of CFBC-S (SEM-EDS analysis).

| Elements           | C               | O    | Na                | Mg   | Al                             | Si               | P                             | S               | K                | Ca    | Ti               | Mn  | Fe                             |
|--------------------|-----------------|------|-------------------|------|--------------------------------|------------------|-------------------------------|-----------------|------------------|-------|------------------|-----|--------------------------------|
| CFBC-S [%], weight | 1.33            | 43.8 | 0.74              | 2.51 | 3.54                           | 3.74             | 14.2                          | 0.46            | 0.19             | 27.1  | 0.44             | —   | 1.89                           |
| CFBC-S [%], atomic | 2.5             | 61.6 | 0.72              | 2.33 | 2.95                           | 2.99             | 10.3                          | 0.32            | 0.11             | 15.2  | 0.21             | —   | 0.76                           |
| Oxides             | CO <sub>2</sub> |      | Na <sub>2</sub> O | MgO  | Al <sub>2</sub> O <sub>3</sub> | SiO <sub>2</sub> | P <sub>2</sub> O <sub>5</sub> | SO <sub>3</sub> | K <sub>2</sub> O | CaO   | TiO <sub>2</sub> | MnO | Fe <sub>2</sub> O <sub>3</sub> |
| CFBC-S [%]         | 4.89            |      | 1.0               | 4.17 | 6.68                           | 7.99             | 32.48                         | 1.14            | 0.23             | 37.98 | 0.73             | -   | 2.71                           |
