# Supplementary material
Source: MDPI journal article supplement (https://www.mdpi.com/1996-1073/16/15/5688)

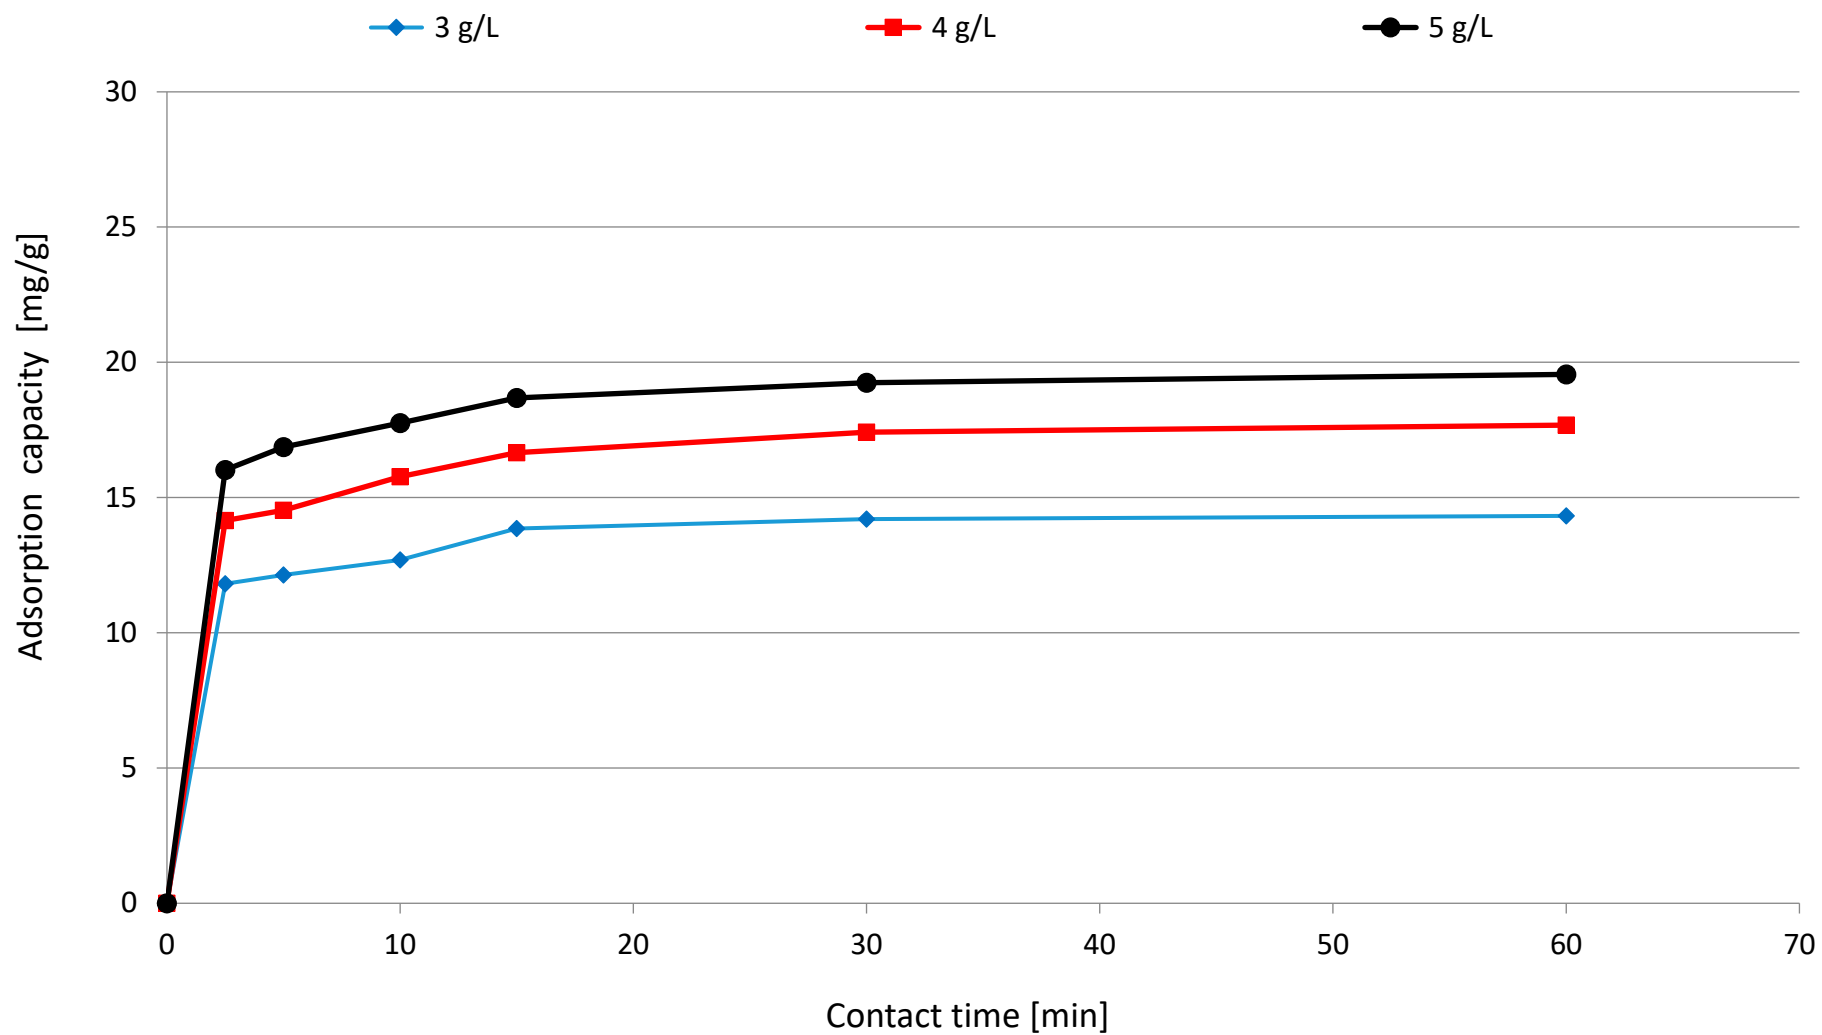

**Figure S4.** The impact of contact time on adsorption capacity of Cu(II) ions.

Supplement: s1 [file s1]

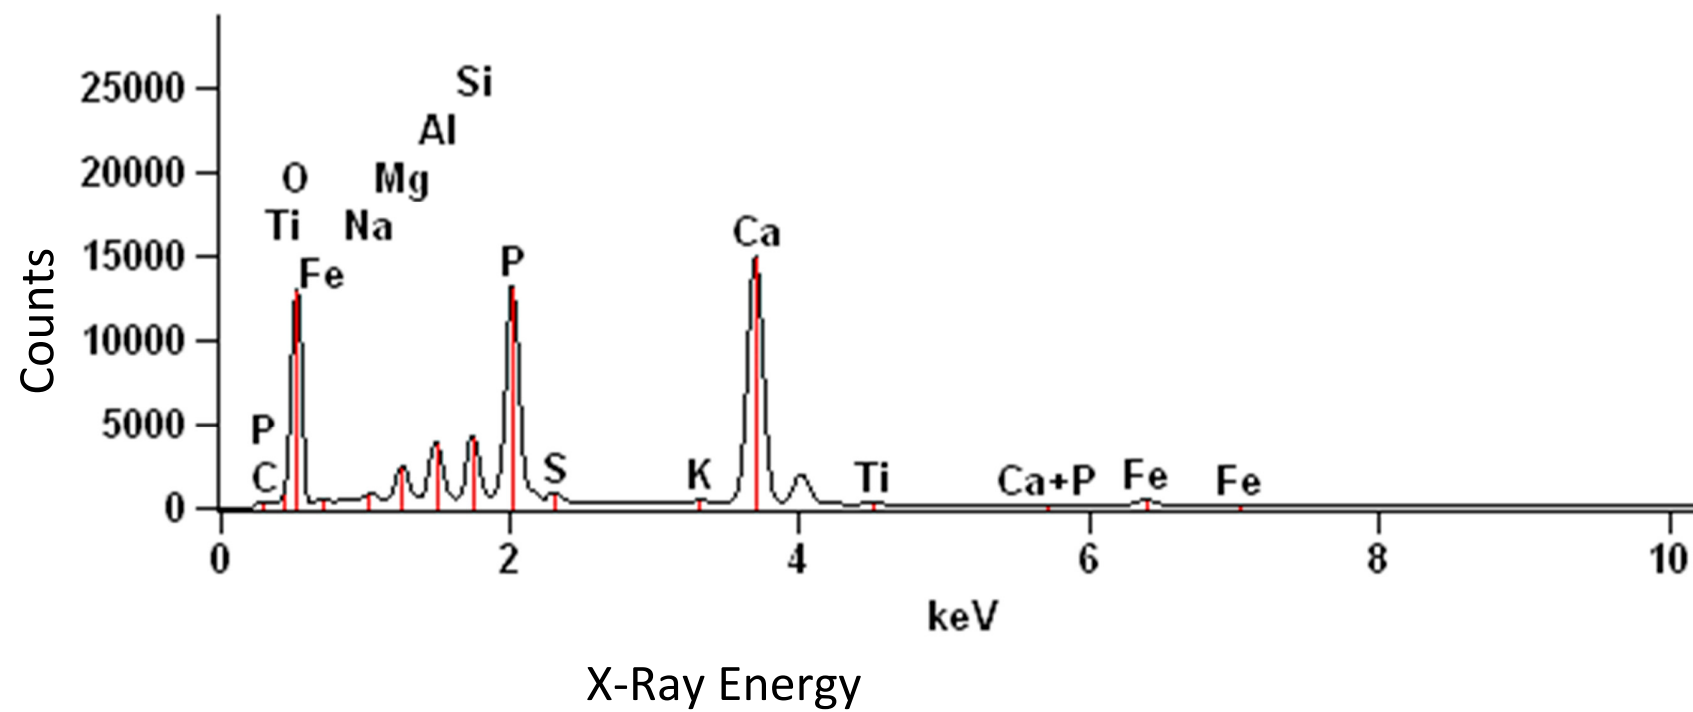

**Figure S1.** EDS spectrum of CFBC slag (magn. x200).

Supplement: s1 [file s1 › Figure S1, supplement.pdf]

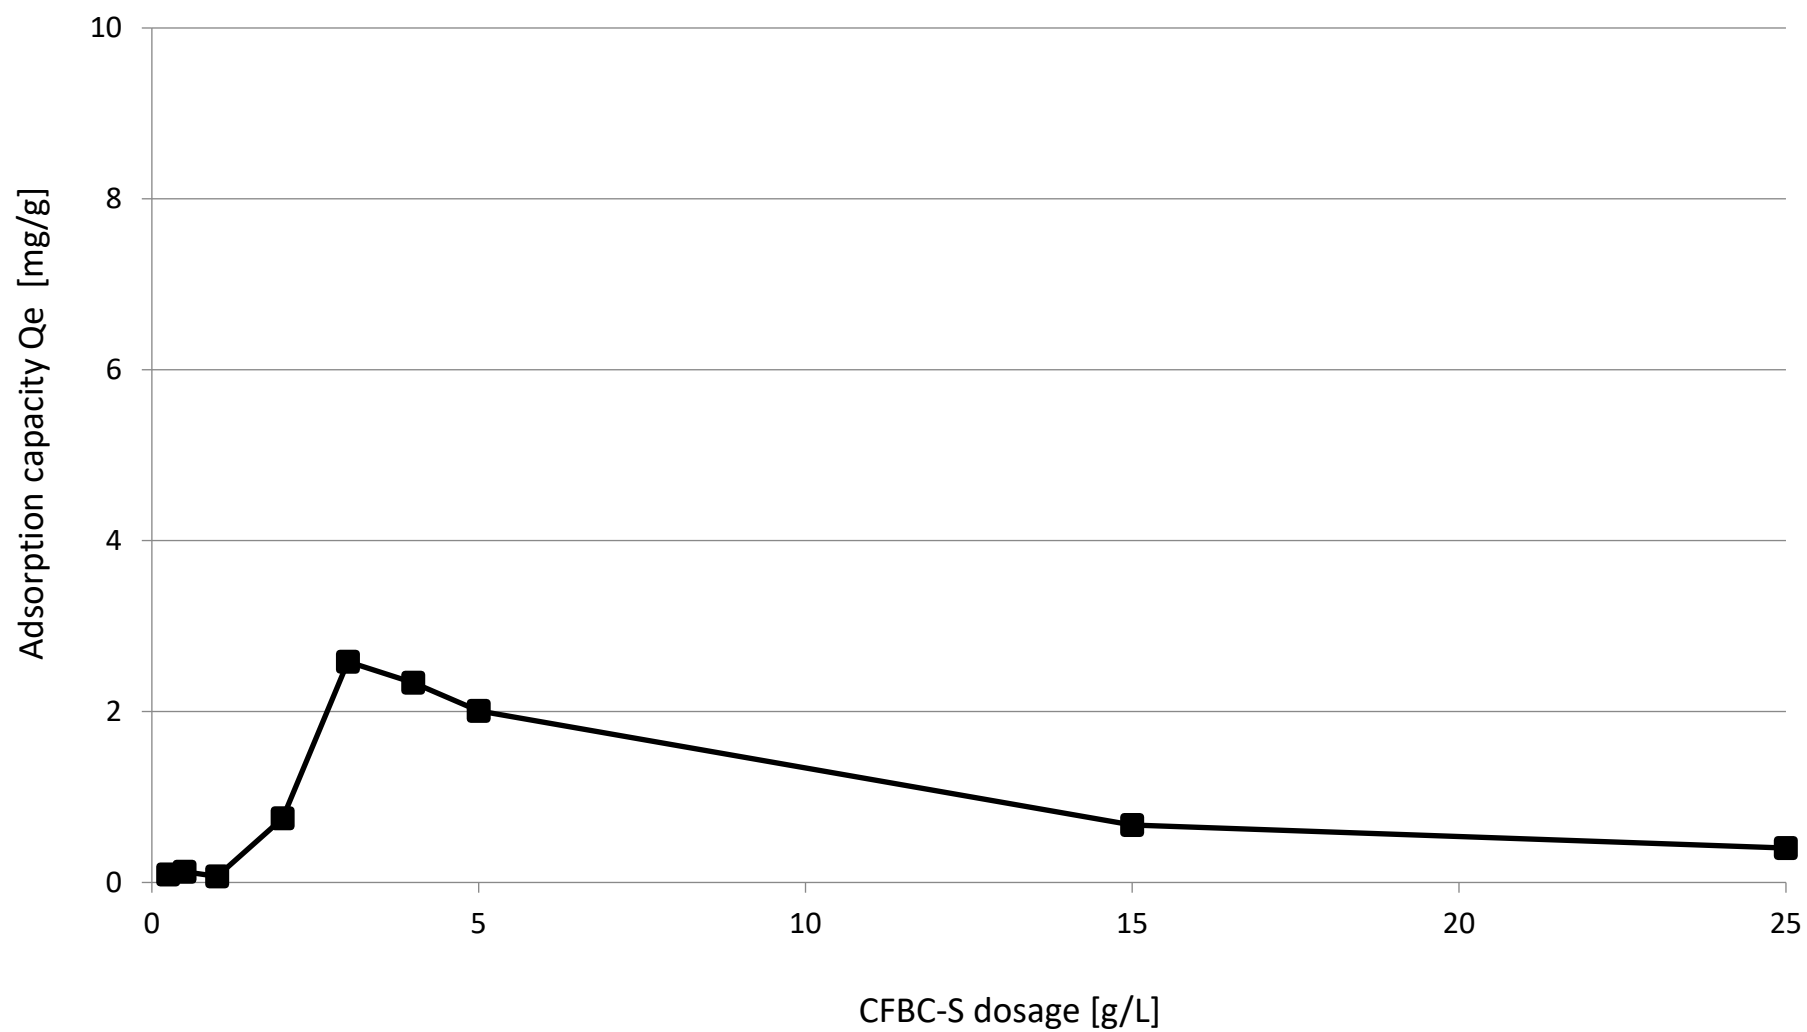

**Figure S2.** The impact of adsorbent dosage on adsorption capacity of Cu(II).

Supplement: s1 [file s1 › Figure S2, supplement.pdf]

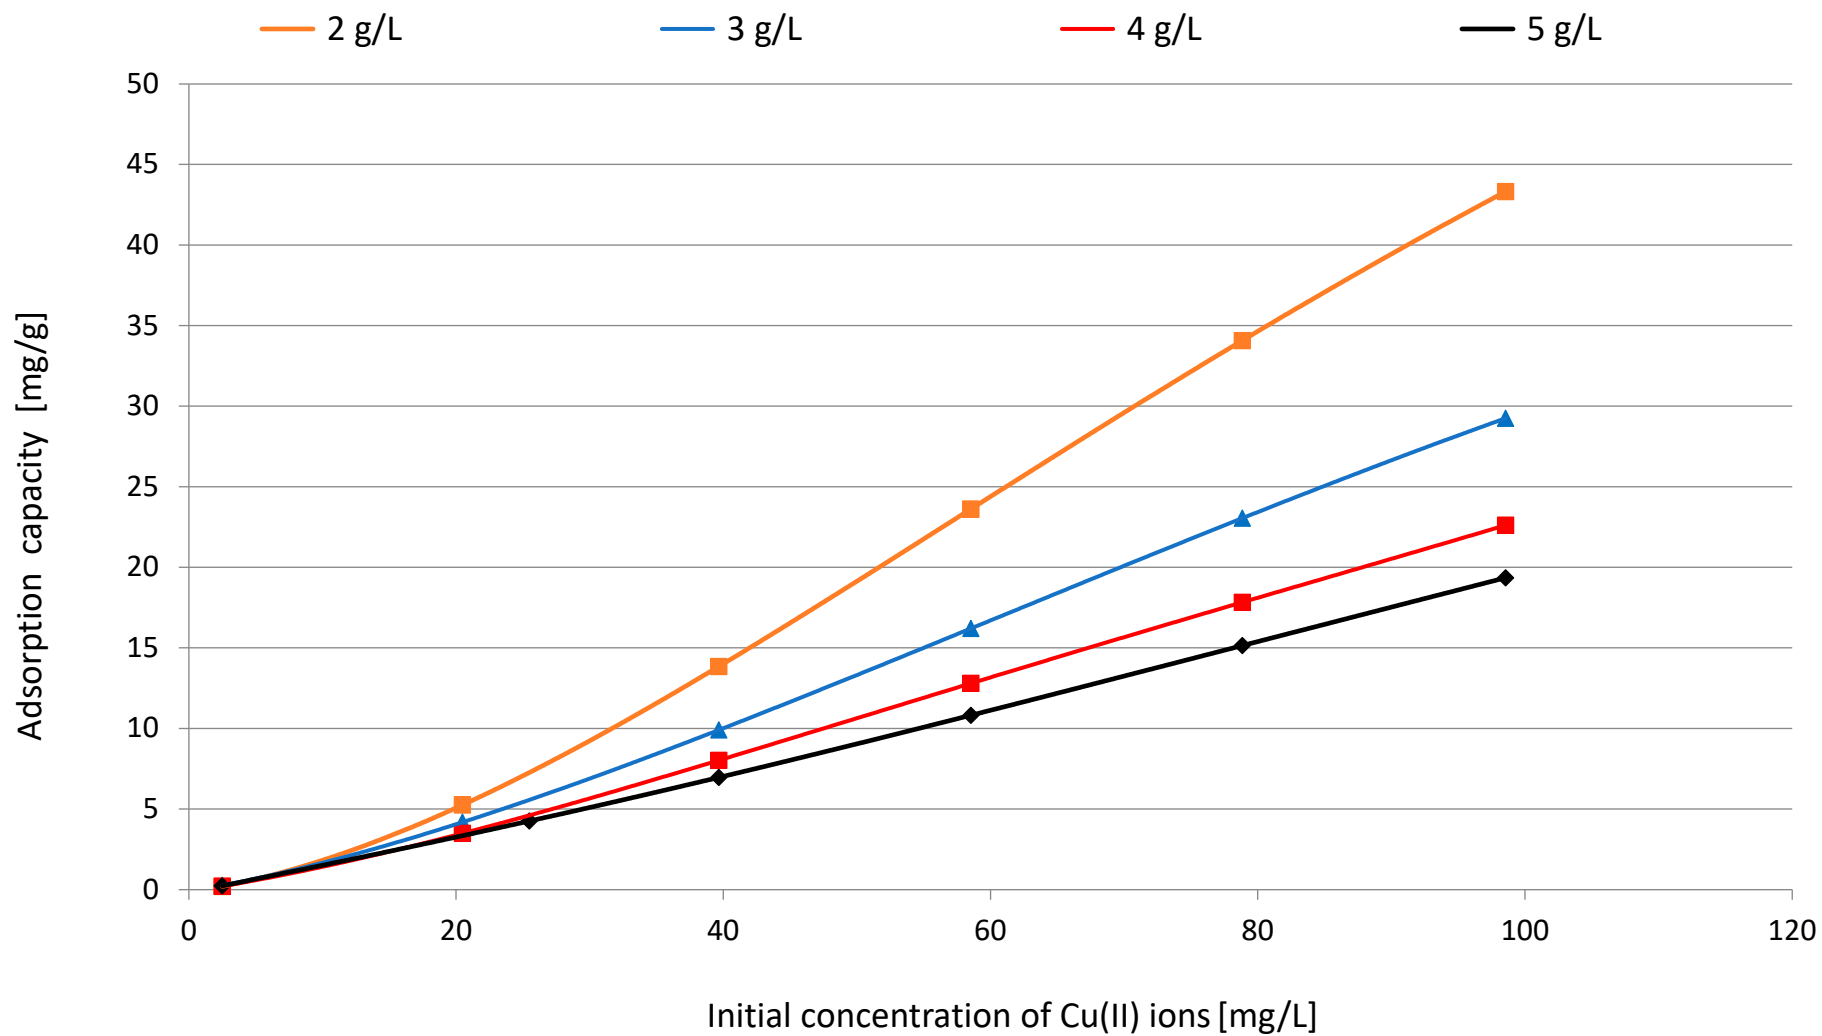

**Figure S3.** The impact of initial concentration of Cu(II) ions on adsorption capacity.

Supplement: s1 [file s1 › Figure S3, supplement.pdf]
